1 **Comparison of long-term outcomes between enteral**  
2 **nutrition via gastrostomy and total parenteral nutrition**  
3 **in the elderly with dysphagia: A propensity-matched**  
4 **cohort study**

5

6 Short title: Long-term outcomes after PEG and TPN

7

8 Shigenori Masaki <sup>1¶</sup>, Takashi Kawamoto <sup>2¶</sup>

9

10 <sup>1</sup> Shigenori Masaki, Department of Surgery and Gastroenterology, Miyanomori Memorial  
11 Hospital, Sapporo, Hokkaido, Japan

12

13 <sup>2</sup> Takashi Kawamoto, Department of Neurosurgery, Miyanomori Memorial Hospital,  
14 Sapporo, Hokkaido, Japan

15

16 \*Corresponding author

17 E-mail: [ayukkyjp@yahoo.co.jp](mailto:ayukkyjp@yahoo.co.jp) (SM)

18

19 ¶ These authors contributed equally to this work.

## 20 **Abstract**

## 21 **Background**

22 The long-term outcomes of artificial nutrition and hydration (ANH) in the elderly with  
23 dysphagia remain uncertain. Enteral nutrition via percutaneous endoscopic gastrostomy  
24 (PEG) and total parenteral nutrition (TPN) are major methods of ANH. Although both  
25 can be a life-prolonging treatments, Japan has recently come to view PEG as  
26 representative of unnecessary life-prolonging treatment. Consequently, TPN is often  
27 chosen for ANH instead. This study aimed to compare the long-term outcomes between  
28 PEG and TPN in the elderly.

## 29 **Methods**

30 This single-center retrospective cohort study identified 253 elderly patients with  
31 dysphagia who received enteral nutrition via PEG ( $n=180$ ) or TPN ( $n=73$ ) between  
32 January 2014 and January 2017. The primary outcome was survival time. Secondary  
33 outcomes were oral intake recovery, discharge to home, and the incidence of severe  
34 pneumonia and sepsis. We performed one-to-one propensity score matching using a 0.05  
35 caliper. The Kaplan–Meier method, log-rank test, and Cox proportional hazards model  
36 were used to analyze the survival time between groups.

## 37 **Results**

38 Older patients with lower nutritional states, and severe dementia were more likely to  
39 receive TPN. Propensity score matching created 55 pairs. Survival time was significantly  
40 longer in the PEG group (median, 317 vs 195 days;  $P=0.017$ ). The hazard ratio for PEG  
41 relative to TPN was 0.60 (95% confidence interval: 0.39–0.92;  $P=0.019$ ). There were no  
42 significant differences between the groups in oral intake recovery and discharge to home.  
43 The incidence of severe pneumonia was significantly higher in the PEG group (50.9% vs  
44 25.5%,  $P=0.010$ ), whereas sepsis was significantly higher in the TPN group (10.9% vs  
45 30.9%,  $P=0.018$ ).

## 46 **Conclusions**

47 PEG was associated with a significantly longer survival time, a higher incidence of  
48 severe pneumonia, and a lower incidence of sepsis compared with TPN. These results can  
49 be used in the decision-making process before initiating ANH.

50

## 51 **Introduction**

52 Artificial nutrition and hydration (ANH) is a medical intervention for patients suffering  
53 from dysphagia due to various clinical conditions. ANH is administered via the enteral or  
54 intravenous route, and there are 2 representative types of ANH: Percutaneous endoscopic  
55 gastrostomy (PEG) feeding and total parenteral nutrition (TPN). PEG was initially

56 developed as an enteral feeding technique for pediatric patients with dysphagia [1,2].  
57 Compared to feeding via a nasogastric tube, enteral feeding via PEG can relieve  
58 laryngopharyngeal discomfort and prevent intervention failure; therefore, its use has  
59 become widespread for long-term enteral feeding in multiple patient groups including  
60 pediatric and geriatric populations [3]. However, studies have reported worse outcomes  
61 following PEG feeding in patients with dementia [4,5]; therefore, the use of PEG in  
62 elderly populations is controversial [6,7].

63 TPN is another common method of nutritional management [8,9]. Similar to tube  
64 feeding, TPN is also occasionally used for ANH in elderly patients with dysphagia [10].  
65 Comparing the outcomes of enteral nutrition and parenteral nutrition are major concerns  
66 among clinicians. Previous studies have demonstrated conflicting results among patients  
67 who received enteral nutrition versus those who received parenteral nutrition [11-13].

68 Recently, the general population in Japan has come to view only PEG as representative  
69 of unnecessary life-prolonging treatment although both PEG and TPN can be a life-  
70 prolonging treatment. PEG is generally avoided in elderly patients; hence, a greater  
71 number of elderly patients with dysphagia choose TPN instead of PEG feeding for long-  
72 term ANH [14]. The long-term outcomes of PEG feeding versus TPN in elderly patients  
73 with dysphagia have previously been poorly documented. Therefore, we aimed to

74 compare the long-term outcomes of PEG feeding and TPN in the elderly using propensity  
75 score-matched analysis [15-17].

## 76 **Methods**

### 77 **Study design**

78 This study was a single-center, retrospective cohort study using propensity score-  
79 matched analysis. A total of 315 consecutive elderly patients with dysphagia who  
80 underwent PEG ( $n=186$ ) or TPN ( $n=129$ ) for long-term ANH between January 2014 and  
81 January 2017 were considered for inclusion in the study. All PEGs were performed using  
82 the modified introducer method [18]. Central venous lines for TPN included implantable  
83 central venous ports (PORT), non-tunneled central venous catheters (NT-CVC) and  
84 peripherally inserted central catheters (PICC). We excluded patients who had advanced  
85 cancer, and those who required a PEG for gastric decompression. We also excluded TPN  
86 patients who had a PEG inserted before January 2014. Patients who received both PEG  
87 feeding and TPN between January 2014 and January 2017 were assigned to the PEG  
88 group. Finally, a total of 253 patients (180 with PEG and 73 with TPN) were included in  
89 this study.

90 The decision for PEG feeding or TPN was made after sufficient discussion between  
91 patients or their family and clinicians. In the TPN cases, the choices of PORT, NT-CVC

92 and PICC were decided based on the patient's or their family's request and the feasibility  
93 and acceptability of each catheter in the discharge destination. Appropriate nutrition was  
94 administered based on clinical evaluation by clinicians. Clinical details were obtained  
95 from patients' medical charts including age, gender, height, weight, underlying diseases,  
96 and blood test results. We used blood test results performed within 7 days before the start  
97 of PEG feeding or TPN. Body mass index (BMI) was calculated using the data of height  
98 and weight measured on admission. We investigated daily calorie intake on the seventh  
99 day after the procedure in both groups. We calculated the median (interquartile range;  
100 IQR) values for BMI and daily calorie intake.

101 Because of the anonymous nature of the data, the requirement for informed consent  
102 was waived. Study approval was obtained from the Ethical Review Board of Miyanomori  
103 Memorial Hospital.

## 104 **Outcomes**

105 The primary outcome was defined as survival time after the start of the procedure. The  
106 secondary outcomes included oral intake recovery, discharge to home, and the incidence  
107 of severe pneumonia and sepsis. Oral intake recovery was defined as withdrawal from  
108 PEG feeding or TPN over 1 month during the observational period. Discharge to home  
109 included discharge to private residential home and housing with health and welfare

110 services for the elderly. Definitions of oral intake recovery and discharge to home were  
111 based on that of the Ministry of Health, Labour and Welfare of Japan [19]. The diagnosis  
112 of severe pneumonia and sepsis was based on general diagnostic criteria in Japan.

### 113 **Statistical analysis**

114 We used propensity score matching to adjust baseline differences between the groups  
115 [15-17]. The propensity score was calculated by logistic regression for estimating the  
116 probability that a patient would receive PEG feeding or TPN. We defined the following  
117 variables as potential confounders: Age, gender, underlying diseases (cerebrovascular  
118 diseases, severe dementia, neuromuscular diseases, previous history of aspiration  
119 pneumonia, ischemic heart diseases, chronic heart failure, chronic lung diseases, chronic  
120 liver diseases, chronic kidney diseases), and laboratory values (serum albumin, total  
121 lymphocyte count [TLC], total cholesterol [TC], hemoglobin and C-reactive protein) [20-  
122 26]. We performed multiple imputation to handle missing data. We created and analyzed  
123 20 multiply imputed data sets [27,28]. The area under the receiver operating characteristic  
124 (ROC) curve was created to evaluate the performance of the logistic regression model for  
125 estimating propensity score [29]. One-to-one propensity score matching was performed  
126 to compare the primary and secondary outcomes between the groups using a 0.05 caliper,  
127 equal to 0.2 of the standard deviation of the logit of the propensity score [30,31].

128 We examined patient characteristics before and after propensity score matching  
129 between the groups. Continuous variables were compared with the use of the t-test or the  
130 Mann–Whitney U test, as appropriate, and categorical variables were compared with the  
131 use of Fisher’s exact test between the groups.

132 Survival was estimated with the Kaplan–Meier method, and the survival rate was  
133 compared using the log-rank test. We performed subgroup analysis for survival to  
134 investigate the effect of age, gender, cerebrovascular disease, severe dementia, and serum  
135 albumin. Data were censored on 28th February 2018. Cox proportional hazards models  
136 were used to estimate the hazard ratio (HR) of death for PEG feeding compared to TPN.  
137 Logistic regression analyses were used to estimate the odds ratio (OR) of outcomes. The  
138 threshold for significance was  $P < 0.05$ . All statistical analyses were conducted using EZR  
139 version 1.37, a graphical user interface for R (The R Foundation for Statistical Computing,  
140 version 3.4.1) [32]. The Packages 'rms version 5.1–2' and 'Matching version 4.9–3' of the  
141 R software were used for multiple imputation and propensity score matching.

## 142 **Results**

143 A total of 253 patients met the criteria for study inclusion, 180 of whom underwent PEG  
144 and 73 of whom underwent TPN. The TPN group included 28 cases of PORT, 26 cases  
145 of NT-CVC, and 19 cases of PICC. The median length of follow-up for censored cases



146 was 601 (range, 404–823) days.

147 In the PEG group, missing values for TC were observed in 11 cases (6.1%). In the TPN  
148 group, missing TC and TLC values were observed in 1 case (1.4%) and 5 cases (6.8%),  
149 respectively. Missing data occurred at random because TC and TLC are not included in  
150 routine blood tests in our hospital.

151 Propensity score matching created 55 pairs in the PEG and TPN groups. The good fit is  
152 confirmed by the ROC curve with an area under the curve value of 0.82 (95% confidence  
153 interval [CI]: 0.76–0.87). The baseline characteristics before propensity score matching  
154 between the groups are shown in **Table 1**.

**Table 1.** Baseline characteristics of patients before propensity score matching.

| Variable                                  | PEG group<br>( <i>n</i> = 180) | TPN group<br>( <i>n</i> = 73) | <i>P</i> -value |
|-------------------------------------------|--------------------------------|-------------------------------|-----------------|
| Age (yr)                                  | 83<br>(78–88)                  | 88<br>(83–90)                 | < 0.001         |
| Sex (male)                                | 71 (39.4%)                     | 28 (38.4%)                    | 1.00            |
| Cerebrovascular diseases                  | 107 (59.4%)                    | 26 (35.6%)                    | 0.001           |
| Severe dementia                           | 57 (31.7%)                     | 45 (61.6%)                    | < 0.001         |
| Neuromuscular diseases                    | 10 (5.6%)                      | 4 (5.5%)                      | 1.00            |
| Aspiration pneumonia                      | 73 (40.6%)                     | 21 (28.8%)                    | 0.086           |
| Ischemic heart diseases                   | 31 (17.2%)                     | 16 (21.9%)                    | 0.38            |
| Chronic heart failure                     | 70 (38.9%)                     | 37 (50.7%)                    | 0.093           |
| Chronic lung diseases                     | 12 (6.7%)                      | 7 (9.6%)                      | 0.44            |
| Chronic liver diseases                    | 9 (5.0%)                       | 6 (8.2%)                      | 0.38            |
| Chronic kidney diseases                   | 29 (16.1%)                     | 24 (32.9%)                    | 0.006           |
| Serum albumin (g/dl)                      | 3.3<br>(2.9–3.7)               | 2.9<br>(2.4–3.2)              | < 0.001         |
| Total lymphocyte count (mm <sup>3</sup> ) | 1236                           | 1058                          | 0.015           |

|                            |             |            |         |
|----------------------------|-------------|------------|---------|
|                            | (940–1628)  | (699–1505) |         |
| Total cholesterol (mg/dl)  | 160         | 142        | 0.006   |
|                            | (133–187)   | (115–172)  |         |
| Hemoglobin (g/dl)          | 11.3        | 10.0       | < 0.001 |
|                            | (10.2–12.7) | (8.9–11.7) |         |
| C-reactive protein (mg/dl) | 0.7         | 2.0        | < 0.001 |
|                            | (0.2–2.9)   | (0.7–4.3)  |         |

Values of age, serum albumin, total lymphocyte count, total cholesterol, hemoglobin, and C-reactive protein are median (IQR). Values of the other variables are number (%).

155 Patients with older age; severe dementia; chronic kidney disease; lower serum albumin,  
 156 TLC, TC, and hemoglobin levels, as well as higher C-reactive protein levels were more  
 157 likely to receive TPN. Patients with cerebrovascular disease were more likely to receive  
 158 PEG feeding. The baseline characteristics after propensity-score matching between the  
 159 groups are shown in **Table 2**.

**Table 2.** Baseline characteristics of patients after propensity score matching.

| Variable                 | PEG group<br>( <i>n</i> = 55) | TPN group<br>( <i>n</i> = 55) | <i>P</i> -value |
|--------------------------|-------------------------------|-------------------------------|-----------------|
| Age (yr)                 | 86<br>(83–90)                 | 86<br>(81–90)                 | 0.76            |
| Sex (male)               | 21 (38.2%)                    | 23 (41.8%)                    | 0.70            |
| Cerebrovascular diseases | 18 (32.7%)                    | 20 (36.4%)                    | 0.69            |
| Severe dementia          | 31 (56.4%)                    | 34 (61.8%)                    | 0.56            |
| Neuromuscular diseases   | 2 (3.6%)                      | 2 (3.6%)                      | 1.00            |
| Aspiration pneumonia     | 23 (41.8%)                    | 19 (34.5%)                    | 0.43            |
| Ischemic heart diseases  | 11 (20.0%)                    | 12 (21.8%)                    | 0.82            |
| Chronic heart failure    | 30 (54.5%)                    | 25 (45.5%)                    | 0.34            |
| Chronic lung diseases    | 6 (10.9%)                     | 4 (7.3%)                      | 0.51            |
| Chronic liver diseases   | 3 (5.5%)                      | 2 (3.6%)                      | 0.65            |
| Chronic kidney diseases  | 17 (30.9%)                    | 14 (25.5%)                    | 0.53            |
| Serum albumin (g/dl)     | 2.9<br>(2.4–3.3)              | 2.9<br>(2.6–3.2)              | 0.70            |

|                                           |                    |                    |      |
|-------------------------------------------|--------------------|--------------------|------|
| Total lymphocyte count (mm <sup>3</sup> ) | 999<br>(795–1277)  | 1111<br>(708–1481) | 0.63 |
| Total cholesterol (mg/dl)                 | 142<br>(113–156)   | 143<br>(115–173)   | 0.38 |
| Hemoglobin (g/dl)                         | 10.3<br>(8.7–11.1) | 10.2<br>(8.9–11.8) | 0.49 |
| C-reactive protein (mg/dl)                | 2.4<br>(0.3–5.7)   | 2.0<br>(0.6–5.0)   | 0.76 |

---

Values of age, serum albumin, total lymphocyte count, total cholesterol, hemoglobin, and C-reactive protein are median (IQR). Values of the other variables are number (%).

160 After propensity score matching, the baseline characteristics were well balanced between  
161 the groups.

162 In the PEG and TPN groups, the median BMI values (IQR) were 19.0 (3.3) and 18.8  
163 (4.8), respectively. The median daily calorie intake (IQR) was 900 (0) and 770 (250)  
164 kcal/d, respectively.

165 The Kaplan–Meier curve is illustrated in **Fig 1**. The log-rank test showed a significantly  
166 longer survival time in the PEG group compared with the TPN group (median, 317 vs  
167 195 days,  $P=0.017$ ). Cox regression analysis showed that HR for the PEG group relative  
168 to the TPN group was 0.60 (95% CI: 0.39–0.92;  $P=0.019$ ).

169

170 **Fig 1. Kaplan–Meier curves of the propensity-matched groups for PEG and TPN.**

171 Propensity score matching created 55 pairs of patients. In the Cox regression analysis,  
172 HR for PEG relative to TPN was 0.60 (95% CI: 0.39–0.92;  $P=0.019$ ).

173

174 The secondary outcomes of propensity-matched patients in the PEG and TPN groups  
175 are shown in **Table 3**.

**Table 3.** Secondary outcomes of propensity-matched patients (55 pairs) in the PEG and TPN groups.

| Outcome              | PEG<br><i>n</i> (%) | TPN<br><i>n</i> (%) | <i>P</i> -value | <sup>a</sup> Risk difference<br>% (95% CI) |
|----------------------|---------------------|---------------------|-----------------|--------------------------------------------|
| Oral intake recovery | 4 (7.3)             | 3 (5.5)             | 1.00            | 1.8 (−7.3, +10.9)                          |
| Discharge to home    | 7 (12.7)            | 4 (7.3)             | 0.53            | 5.5 (−5.7, +16.6)                          |
| Severe pneumonia     | 28 (50.9)           | 14 (25.5)           | 0.010           | 25.5 (+7.9, +43.0)                         |
| Sepsis               | 6 (10.9)            | 17 (30.9)           | 0.018           | −20.0 (−34.7, −5.3)                        |

<sup>a</sup> The risk difference for the PEG group with reference to the TPN group is shown.

176 There were no significant differences in the rates of oral intake recovery and discharge to  
177 home between groups. The incidence of severe pneumonia was significantly higher in the  
178 PEG group (50.9% vs 25.5%, *P*=0.010), whereas the incidence of sepsis was significantly  
179 higher in the TPN group (10.9% vs 30.9%, *P*=0.018). Logistic regression analyses of the  
180 secondary outcomes in the PEG and TPN groups are shown in **Table 4**.

**Table 4.** Logistic regression analyses of the secondary outcomes in the PEG and TPN groups.

| Outcome              | <sup>a</sup> Odds Ratio (95% CI) | <i>P</i> -value |
|----------------------|----------------------------------|-----------------|
| Oral intake recovery | 1.36 (0.29–6.38)                 | 0.70            |
| Discharge to home    | 1.86 (0.51–6.76)                 | 0.35            |
| Severe pneumonia     | 3.04 (1.36–6.79)                 | 0.007           |
| Sepsis               | 0.27 (0.098–0.76)                | 0.013           |

<sup>a</sup> ORs for the PEG group with reference to the TPN group are shown.

181 ORs for the PEG group with reference to the TPN group for severe pneumonia and sepsis

182 were 3.04 (95% CI: 1.36–6.79) and 0.27 (95% CI: 0.098–0.76), respectively.

183 Subgroup analysis for survival is shown using a forest plot in **Fig 2**. In all subgroups,

184 PEG consistently had a better survival compared with TPN.

185

186 **Fig 2. A forest plot of hazard ratios (HRs) for survival in the different subgroups.**

187 HRs from the subgroup analysis for survival between PEG and TPN are shown.

188 HRs of < 1.00 indicate better survival in PEG compared with TPN.

189

## 190 **Discussion**

191 This study investigated the long-term outcomes after PEG feeding and TPN in elderly

192 patients using propensity score-matched analysis. We found that older patients with lower

193 nutritional state, and severe dementia were more likely to receive TPN, whereas patients

194 with cerebrovascular disease were more likely to receive PEG. Survival time was

195 significantly longer in the PEG group. The incidence of severe pneumonia was

196 significantly higher in the PEG group whereas that of sepsis was significantly higher in

197 the TPN group.

198 Previous studies that compared the outcomes of patients managed with enteral nutrition

199 and parenteral nutrition demonstrated conflicting results. For example, with respect to

200 mortality, studies found that enteral nutrition was associated with lower mortality rates  
201 [11] or no effect on overall mortality [33]. It has also been demonstrated that enteral  
202 nutrition is associated with a lower risk of infection [33,34], a higher rate of postoperative  
203 complications rate, and a lower rate of early recovery of oral feeding after operation [13]  
204 compared to parenteral nutrition. The general rule is that enteral feeding should be  
205 considered in patients with normal digestive function whereas TPN should be used if  
206 enteral nutrition is not feasible [35]. Contrastingly, ANH for elderly patients with  
207 dysphagia can be a life-prolonging treatment [36]; therefore, the choice of enteral versus  
208 parenteral nutrition is not only based on the digestive function of the patients but also on  
209 their clinical condition and the preferences of the patients and their family members  
210 [14,36,37]. This may result in selection bias and differences in the baseline characteristics  
211 of the PEG feeding and TPN study groups; therefore, we performed propensity score  
212 matching to adjust baseline characteristics to compare the effect of PEG feeding and TPN  
213 more accurately [15-17,23].

214 In this study, a comparison of baseline characteristics between the groups before  
215 propensity score matching revealed that patients with older age, lower serum albumin  
216 levels, higher C-reactive protein levels, and severe dementia were more likely to receive  
217 TPN. Older age, lower serum albumin levels, higher C-reactive protein levels, and severe

218 dementia were reported as poor prognostic factors after PEG [4,5,20-22,38]. Our results  
219 indicated that PEG tended to be avoided in patients with such poor prognostic factors,  
220 and as a result, TPN was chosen as the alternative modality for ANH. Furthermore, TLC,  
221 TC, and hemoglobin were significantly lower in the TPN group than in the PEG group  
222 before propensity score matching, suggesting that TPN tended to be chosen for patients  
223 with a poorer general condition.

224 Survival analysis showed better results in the PEG group than in the TPN group. This  
225 may be explained by the fact that enteral nutrition has gastrointestinal, immune, and  
226 metabolic benefits compared with parenteral nutrition [35,39,40]. Additionally, in this  
227 study, the daily calorie intake was higher in the PEG group than in the TPN group. This  
228 difference between groups may have affected the results of the survival analysis. Previous  
229 studies showed that PEG did not improve survival in patients with dementia [4,5,38]. On  
230 the contrary, it has been reported that dementia was not a significant prognostic factor  
231 after PEG [41]. In our subgroup analysis, PEG was associated with better survival than  
232 TPN even in patients with severe dementia. Furthermore, compared to TPN, PEG showed  
233 a survival benefit regardless of age, sex, cerebrovascular disease, and serum albumin level.  
234 These results suggested that enteral nutrition still had a better impact on survival even in  
235 elderly individuals with a poorer general condition.

236 Most of the previous studies that compared enteral and parenteral nutrition defined  
237 survival and infection rates as the primary and secondary outcomes, respectively  
238 [11,13,23,25,33,34]. Here, we placed importance on quality of life after the start of ANH,  
239 and thus we chose oral intake recovery and discharge to home as the secondary outcomes.  
240 Previous studies showed that age and BMI were predictive factors of oral intake recovery  
241 in stroke patients with tube-feeding [42,43]. In this study, age and BMI were similar  
242 between groups, and there were no significant differences in oral intake recovery between  
243 groups. Oral intake recovery rates were low in both groups, with most patients requiring  
244 continuous ANH. Moreover, there were no significant differences in discharge to home  
245 between groups, indicating that both PEG feeding and TPN were feasible in a home  
246 environment [9,35,44,45]. However, the proportion of patients being discharged to their  
247 homes was also not high in either group, suggesting that most of the elderly patients with  
248 dysphagia requiring ANH were bound to stay in long-term care facilities rather than their  
249 own homes regardless of receiving PEG feeding or TPN. It is necessary to provide  
250 patients and their family members with information regarding the general clinical course  
251 to aid their decision-making process before initiating ANH [46]; our results add to such  
252 clinical information for supporting the decision-making process.  
253 The incidence of severe pneumonia was significantly higher in the PEG group. This



254 result was expected and clinically plausible because enteral nutrition administered via  
255 PEG poses a risk of gastroesophageal reflux and aspiration pneumonia owing to the  
256 underlying pharyngeal and laryngeal dysfunction of patients who require feeding through  
257 this modality [23,35,47]. Switching from PEG feeding to TPN may be an option for  
258 patients who underwent PEG feeding and repeatedly suffered from aspiration pneumonia  
259 because TPN is more effective in reducing the risk of severe pneumonia than PEG feeding.  
260 In contrast, as expected, the incidence of sepsis in the TPN group was significantly higher  
261 than that in the PEG group. This may be due to the fact that TPN has been associated with  
262 catheter-related bloodstream infections and bacterial translocation [34,48-50].  
263 Furthermore, the use of NT-CVC for long-term TPN may affect the rate of catheter-  
264 related bloodstream infections and the incidence of sepsis in the TPN group [51].

265 Several limitations of this study should be acknowledged. First, this was a retrospective  
266 observational study without randomization; therefore, assignment to each group may  
267 have been biased. Although propensity score matching was used to adjust the differences  
268 in baseline characteristics, the results may still have been biased because of unmeasured  
269 confounders. Second, the results of this study are applicable only to these patients who  
270 were included in the paired analysis, and therefore the results may not be generalizable to  
271 a broader population. Third, certain patients in the PEG group received not only PEG

272 feeding but also TPN depending on their clinical condition, and furthermore, the daily  
273 calorie intake was not equal between the groups. Fourth, this was a single-center study  
274 with a small sample size.

## 275 **Conclusions**

276 In summary, we performed a propensity-matched analysis to compare the outcomes of  
277 PEG and TPN in the elderly. We found that compared to TPN, PEG was associated with  
278 better survival and a higher incidence of severe pneumonia as well as a lower incidence  
279 of sepsis, with no significant inter-group differences noted in oral intake recovery and  
280 discharge to home. Further studies with a larger sample size and randomized controlled  
281 design are required.

## 282 **Acknowledgments**

283 We would like to thank Editage ([www.editage.jp](http://www.editage.jp)) for English language editing.

## 284 **References**

- 285 1. Gauderer MW, Ponsky JL, Izant RJ Jr. Gastrostomy without laparotomy: a  
286 percutaneous endoscopic technique. *J Pediatr Surg.* 1980; 15: 872-875.
- 287 2. Ponsky JL, Gauderer MW. Percutaneous endoscopic gastrostomy: A nonoperative  
288 technique for feeding gastrostomy. *Gastrointest Endosc.* 1981; 27: 9-11.
- 289 3. Gomes CA Jr, Andriolo RB, Bennett C, Lustosa SA, Matos D, Waisberg DR, et al.

- 290 Percutaneous endoscopic gastrostomy versus nasogastric tube feeding for adults with  
291 swallowing disturbances. *Cochrane Database Syst Rev.* 2015; (5): CD008096.
- 292 4. Finucane TE, Christmas C, Travis K. Tube feeding in patients with advanced dementia:  
293 a review of the evidence. *JAMA.* 1999; 282: 1365-1370.
- 294 5. Sanders DS, Carter MJ, D' Silva J, James G, Bolton RP, Bardhan KD. Survival analysis  
295 in percutaneous endoscopic gastrostomy feeding: a worse outcome in patients with  
296 dementia. *Am J Gastroenterol.* 2000; 95: 1472-1475.
- 297 6. Ticinesi A, Nouvenne A, Lauretani F, Prati B, Cerundolo N, Maggio M, et al. Survival  
298 in older adults with dementia and eating problems: To PEG or not to PEG?. *Clin Nutr.*  
299 2016; 35: 1512-1516.
- 300 7. Cervo FA, Bryan L, Farber S. To PEG or not to PEG: a review of evidence for placing  
301 feeding tubes in advanced dementia and the decision-making process. *Geriatrics.* 2006;  
302 61: 30-35.
- 303 8. Dudrick SJ, Copeland EM 3rd, Daly JM, Long JM 3rd, Duke JH Jr, MacFadyen BV  
304 Jr, et al. A clinical review of nutritional support of the patient. *JPEN J Parenter Enteral*  
305 *Nutr.* 1979; 3: 444-451.
- 306 9. Scolapio JS, Fleming CR, Kelly DG, Wick DM, Zinsmeister AR. Survival of home  
307 parenteral nutrition-treated patients: 20 years of experience at the Mayo Clinic. *Mayo*

- 308 Clin Proc. 1999; 74: 217-222.
- 309 10. Maslow K. Total parenteral nutrition and tube feeding for elderly patients: findings  
310 of an OTA study. JPEN J Parenter Enteral Nutr. 1988; 12: 425-432.
- 311 11. Artinian V, Krayem H, DiGiovine B. Effects of early enteral feeding on the outcome  
312 of critically ill mechanically ventilated medical patients. Chest. 2006; 129: 960-967.
- 313 12. Wicks C, Somasundaram S, Bjarnason I, Menzies IS, Routley D, Potter D, et al.  
314 Comparison of enteral feeding and total parenteral nutrition after liver transplantation.  
315 Lancet. 1994; 344: 837-840.
- 316 13. Perinel J, Mariette C, Dousset B, Sielezneff I, Gainant A, Mabrut JY, et al. Early  
317 enteral versus total parenteral nutrition in patients undergoing pancreaticoduodenectomy:  
318 a randomized multicenter controlled trial (Nutri-DPC). Ann Surg. 2016; 264: 731-737.
- 319 14. Komiya K, Usagawa Y, Kadota J, Ikegami N. Decreasing use of percutaneous  
320 endoscopic gastrostomy tube feeding in Japan. J Am Geriatr Soc. 2018; 66: 1388-1391.
- 321 15. Rosenbaum PR, Rubin DB. The central role of the propensity score in observational  
322 studies for causal effects. Biometrika. 1983; 70: 41-55.
- 323 16. D'Agostino RB Jr. Propensity score methods for bias reduction in the comparison of  
324 a treatment to a non-randomized control group. Stat Med. 1998; 17: 2265-2281.
- 325 17. Griswold ME, Localio AR, Mulrow C. Propensity score adjustment with multilevel

- 326 data: setting your sites on decreasing selection bias. *Ann Intern Med.* 2010; 152: 393-395.
- 327 18. Shigoka H, Maetani I, Tominaga K, Gon K, Saitou M, Takenaka Y. Comparison of  
328 modified introducer method with pull method for percutaneous endoscopic gastrostomy:  
329 prospective randomized study. *Dig Endosc.* 2012; 24: 426-431.
- 330 19. Ministry of Health, Labour and Welfare: “*Shinryōhōshūkatei ni tsuite*” (Revision of  
331 medical fee). Available from:  
332 <https://www.mhlw.go.jp/stf/seisakunitsuite/bunya/0000106602.html> (2018). [cited 23  
333 April 2019] (in Japanese).
- 334 20. Nair S, Hertan H, Pitchumoni CS. Hypoalbuminemia is a poor predictor of survival  
335 after percutaneous endoscopic gastrostomy in elderly patients with dementia. *Am J*  
336 *Gastroenterol.* 2000; 95: 133-136.
- 337 21. Suzuki S, Tamez S, Murakami A, Taira A, Mizuhara A, Horiuchi A, et al. Survival  
338 of geriatric patients after percutaneous endoscopic gastrostomy in Japan. *World J*  
339 *Gastroenterol.* 2010; 16: 5084-5091.
- 340 22. Barbosa M, Magalhaes J, Marinho C, Cotter J. Predictive factors of early mortality  
341 after percutaneous endoscopic gastrostomy placement: The importance of C-reactive  
342 protein. *Clin Nutr ESPEN.* 2016; 14: 19-23.
- 343 23. Tamiya H, Yasunaga H, Matusi H, Fushimi K, Akishita M, Ogawa S. Comparison of

- 344 short-term mortality and morbidity between parenteral and enteral nutrition for adults  
345 without cancer: a propensity-matched analysis using a national inpatient database. *Am J*  
346 *Clin Nutr.* 2015; 102: 1222-1228.
- 347 24. Sun X, Luo L, Zhao X, Ye P. Controlling Nutritional Status (CONUT) score as a  
348 predictor of all-cause mortality in elderly hypertensive patients: a prospective follow-up  
349 study. *BMJ Open.* 2017; 7: e015649.
- 350 25. Bito S, Yamamoto T, Tominaga H. Prospective cohort study comparing the effects of  
351 different artificial nutrition methods on long-term survival in the elderly: Japan  
352 Assessment Study on Procedures and Outcomes of Artificial Nutrition (JAPOAN). *JPEN*  
353 *J Parenter Enteral Nutr.* 2015; 39: 456-464.
- 354 26. Woo J, Chan SM, Mak YT, Swaminathan R. Biochemical predictors of short term  
355 mortality in elderly residents of chronic care institutions. *J Clin Pathol.* 1989; 42: 1241-  
356 1245.
- 357 27. Rubin DB, Schenker N. Multiple imputation in health-care databases: an overview  
358 and some applications. *Stat Med.* 1991; 10: 585-598.
- 359 28. Li P, Stuart EA, Allison DB. Multiple imputation: a flexible tool for handling missing  
360 data. *JAMA.* 2015; 314: 1966-1967.
- 361 29. Stürmer T, Joshi M, Glynn RJ, Avorn J, Rothman KJ, Schneeweiss S. A review of

362 the application of propensity score methods yielded increasing use, advantages in specific  
363 settings, but not substantially different estimates compared with conventional  
364 multivariable methods. *J Clin Epidemiol.* 2006; 59: 437-447.

365 30. Lunt M. Selecting an appropriate caliper can be essential for achieving good balance  
366 with propensity score matching. *Am J Epidemiol.* 2014; 179: 226-235.

367 31. Wang Y, Cai H, Li C, Jiang Z, Wang L, Song J, et al. Optimal caliper width for  
368 propensity score matching of three treatment groups: a Monte Carlo study. *PLoS One.*  
369 2013; 8: e81045.

370 32. Kanda Y. Investigation of the freely available easy-to-use software 'EZR' for medical  
371 statistics. *Bone Marrow Transplantation.* 2013; 48: 452-458.

372 33. Elke G, van Zanten AR, Lemieux M, McCall M, Jeejeebhoy KN, Kott M, et al. Enteral  
373 versus parenteral nutrition in critically ill patients: an updated systematic review and  
374 meta-analysis of randomized controlled trials. *Crit Care.* 2016; 20: 117.

375 34. Braunschweig CL, Levy P, Sheean PM, Wang X. Enteral compared with parenteral  
376 nutrition: a meta-analysis. *Am J Clin Nutr.* 2001; 74: 534-542.

377 35. McClave SA, DiBaise JK, Mullin GE, Martindale RG. ACG clinical guideline:  
378 nutrition therapy in the adult hospitalized patient. *Am J Gastroenterol.* 2016; 111: 315-  
379 334.

- 380 36. Casarett D, Kapo J, Caplan A. Appropriate use of artificial nutrition and hydration —  
381 fundamental principles and recommendations. *N Engl J Med.* 2005; 353: 2607-2612.
- 382 37. Druml C, Ballmer PE, Druml W, Oehmichen F, Shenkin A, Singer P, et al. ESPEN  
383 guideline on ethical aspects of artificial nutrition and hydration. *Clin Nutr.* 2016; 35: 545-  
384 556.
- 385 38. Murphy LM, Lipman TO. Percutaneous endoscopic gastrostomy does not prolong  
386 survival in patients with dementia. *Arch Intern Med.* 2003; 163: 1351-1353.
- 387 39. Li G, Gu R, Wen X, Wei D, Ming X, Chen H. The effect of early enteral nutrition on  
388 hyperthermic intraoperative intraperitoneal chemotherapy-induced mucosal permeability  
389 following gastrectomy. *JPEN J Parenter Enteral Nutr.* 2012; 36: 213-218.
- 390 40. McClave SA, Martindale RG, Rice TW, Heyland DK. Feeding the critically ill patient.  
391 *Crit Care Med.* 2014; 42: 2600-2610.
- 392 41. Higaki F, Yokota O, Ohishi M. Factors predictive of survival after percutaneous  
393 endoscopic gastrostomy in the elderly: is dementia really a risk factor? *Am J*  
394 *Gastroenterol.* 2008; 103: 1011-1016.
- 395 42. Nakadate A, Otaka Y, Kondo K, Yamamoto R, Matsuura D, Honaga K, et al. Age,  
396 body mass index, and white blood cell count predict the resumption of oral intake in  
397 subacute stroke patients. *J Stroke Cerebrovasc Dis.* 2016; 25: 2801-2808.



- 398 43. Ikenaga Y, Nakayama S, Taniguchi H, Ohori I, Komatsu N, Nishimura H, et al.  
399 Factors predicting recovery of oral intake in stroke survivors with dysphagia in a  
400 convalescent rehabilitation ward. *J Stroke Cerebrovasc Dis.* 2017; 26: 1013-1019.
- 401 44. Delegge MH , McClave SA , DiSario JA, Baskin WN, Brown RD, Fang JC, et al.  
402 Ethical and medicolegal aspects of PEG-tube placement and provision of artificial  
403 nutritional therapy. *Gastrointest Endosc.* 2005; 62: 952-959.
- 404 45. Messing B, Joly F. Guidelines for management of home parenteral support in adult  
405 chronic intestinal failure patients. *Gastroenterology.* 2006; 130: S43-S51.
- 406 46. Kuraoka Y, Nakayama K. A decision aid regarding long-term tube feeding targeting  
407 substitute decision makers for cognitively impaired older persons in Japan: a small-scale  
408 before-and-after study. *BMC Geriatr.* 2014; 14: 16.
- 409 47. Wang D, Zheng SQ, Chen XC, Jiang SW, Chen HB. Comparisons between small  
410 intestinal and gastric feeding in severe traumatic brain injury: a systematic review and  
411 meta-analysis of randomized controlled trials. *J Neurosurg.* 2015; 123: 1194-1201.
- 412 48. Lissauer ME, Leekha S, Preas MA, Thom KA, Johnson SB. Risk factors for central  
413 line-associated bloodstream infections in the era of best practice. *J Trauma Acute Care*  
414 *Surg.* 2012; 72: 1174-1180.
- 415 49. Chopra V, Ratz D, Kuhn L, Lopus T, Chenoweth C, Krein S. PICC-associated

416 bloodstream infections: prevalence, patterns, and predictors. *Am J Med.* 2014; 127: 319-

417 328.

418 50. MacFie J. Enteral versus parenteral nutrition: the significance of bacterial

419 translocation and gut-barrier function. *Nutrition.* 2000; 16: 606-611.

420 51. Pittiruti M, Hamilton H, Biffi R, MacFie J, Pertkiewicz M. ESPEN guidelines on

421 parenteral nutrition: central venous catheters (access, care, diagnosis and therapy of

422 complications). *Clin Nutr.* 2009; 28: 365-377.

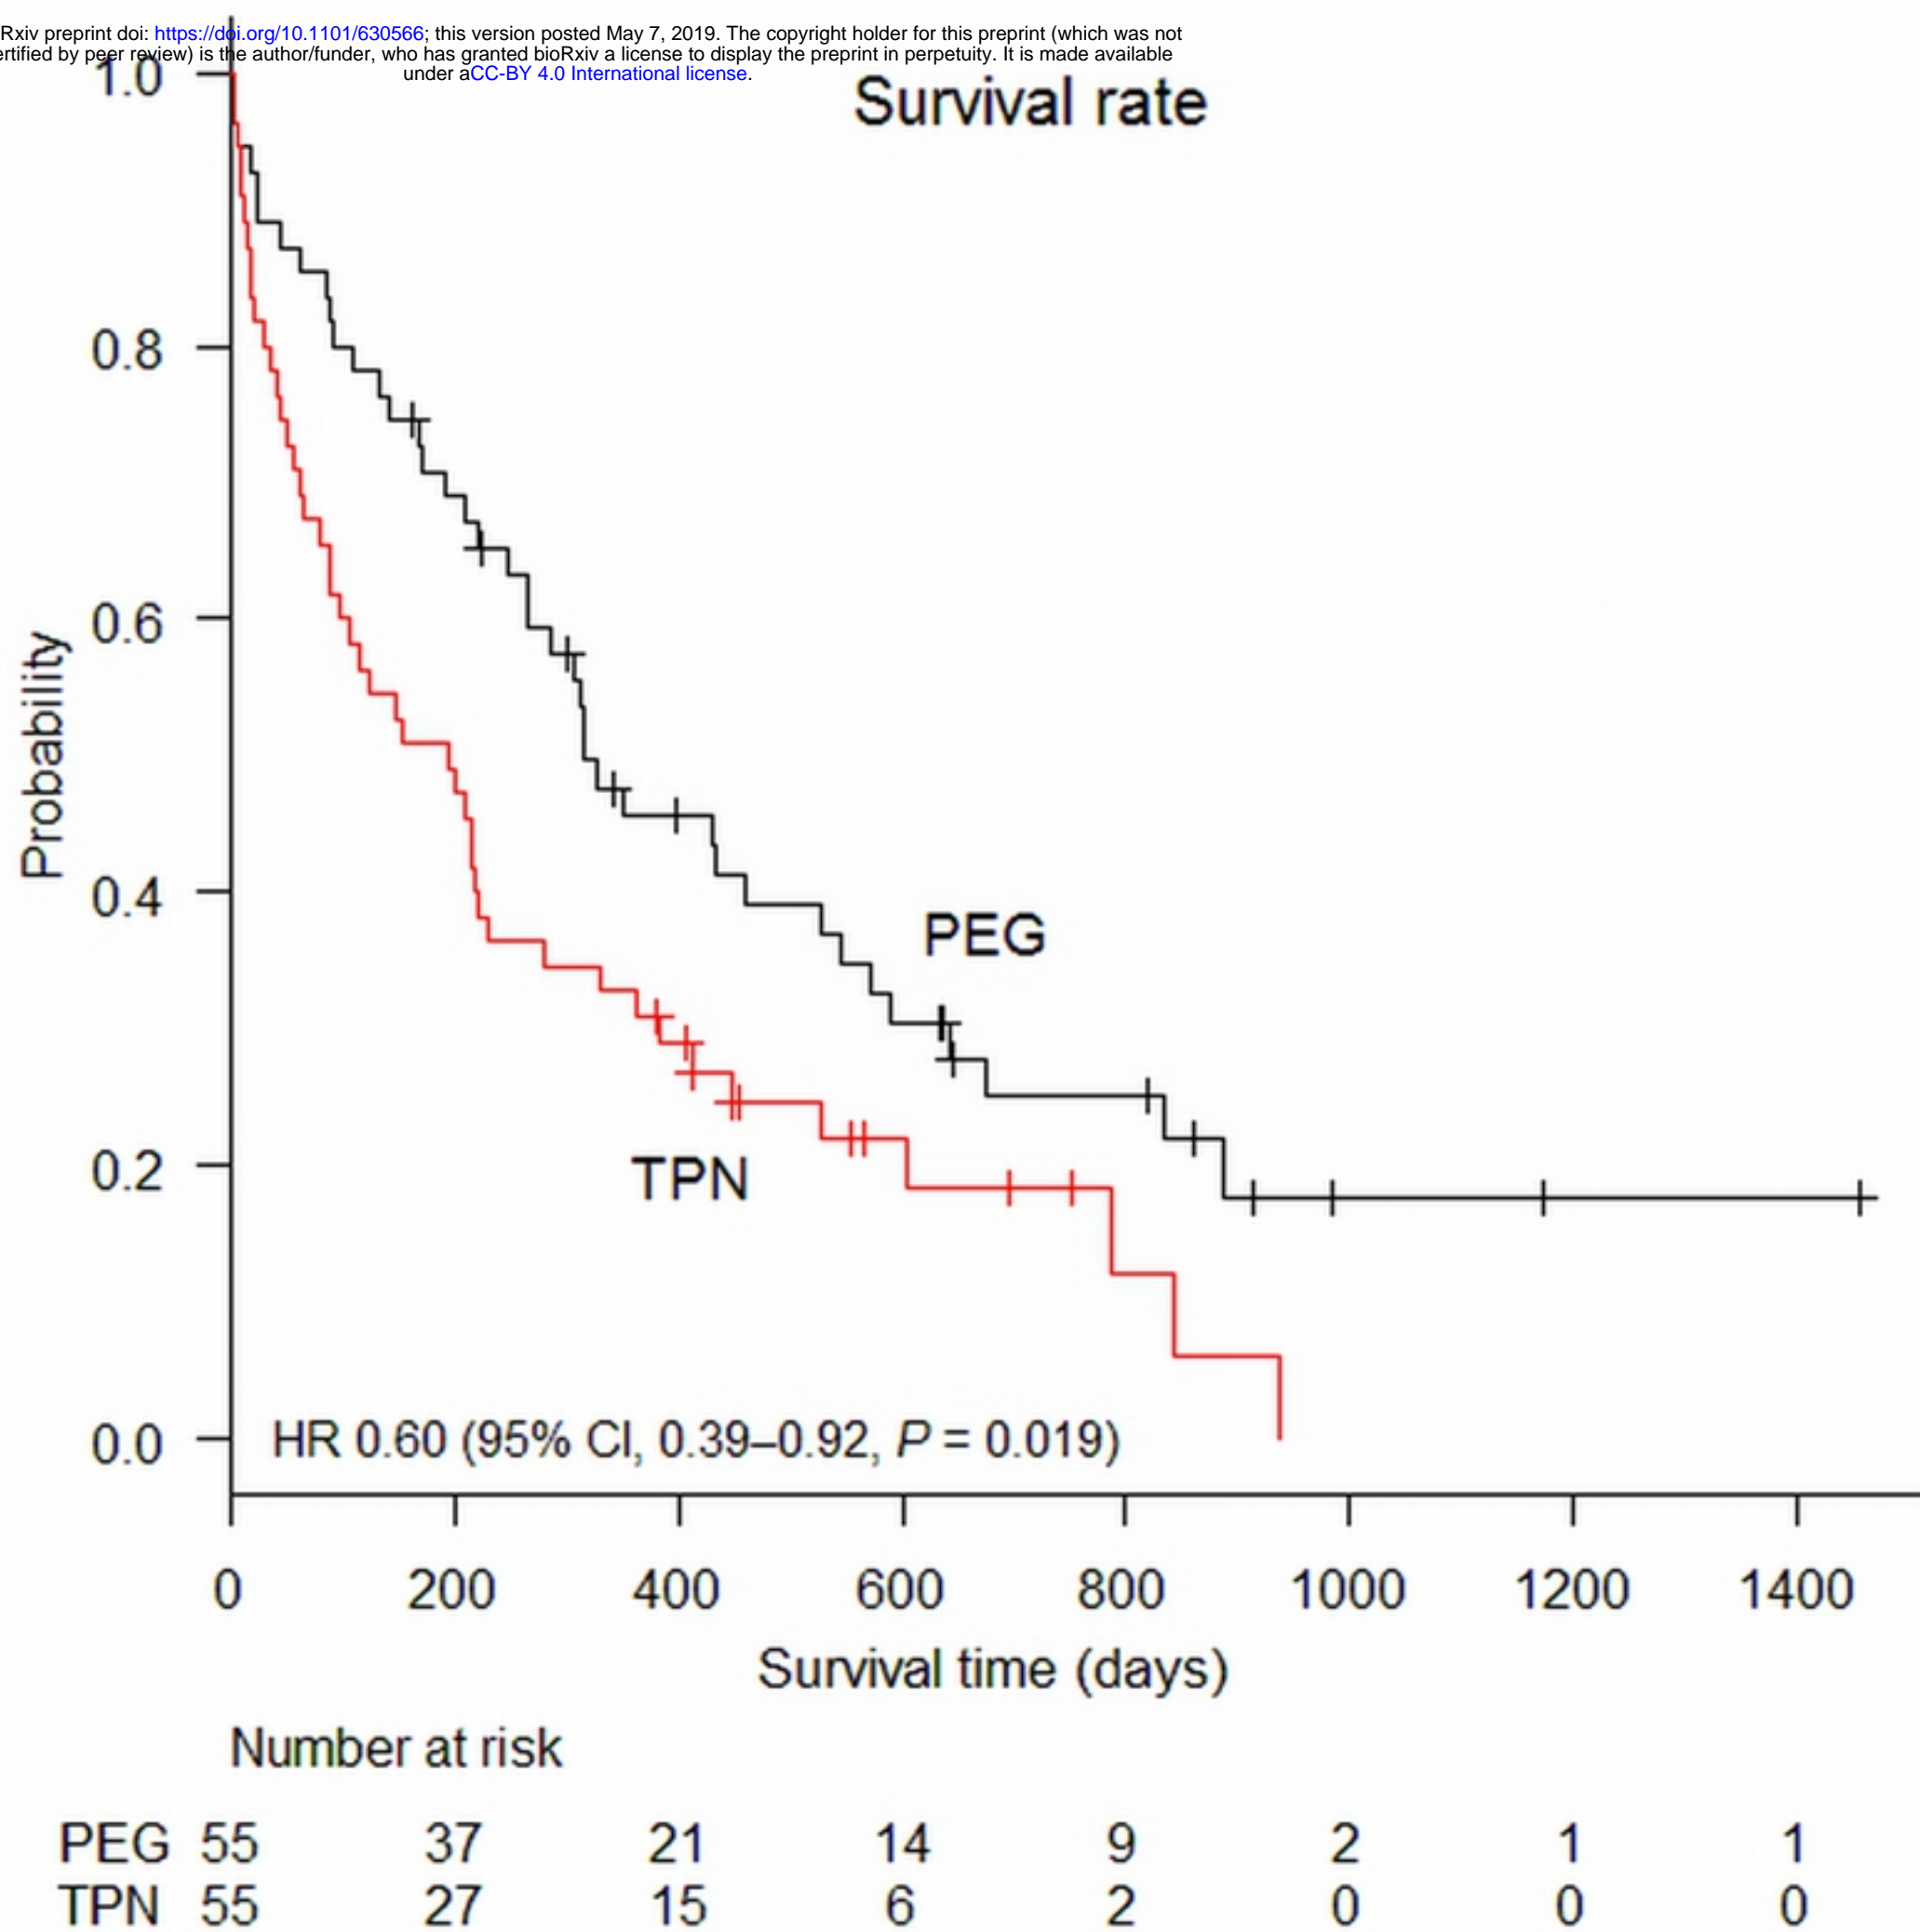

Figure 1

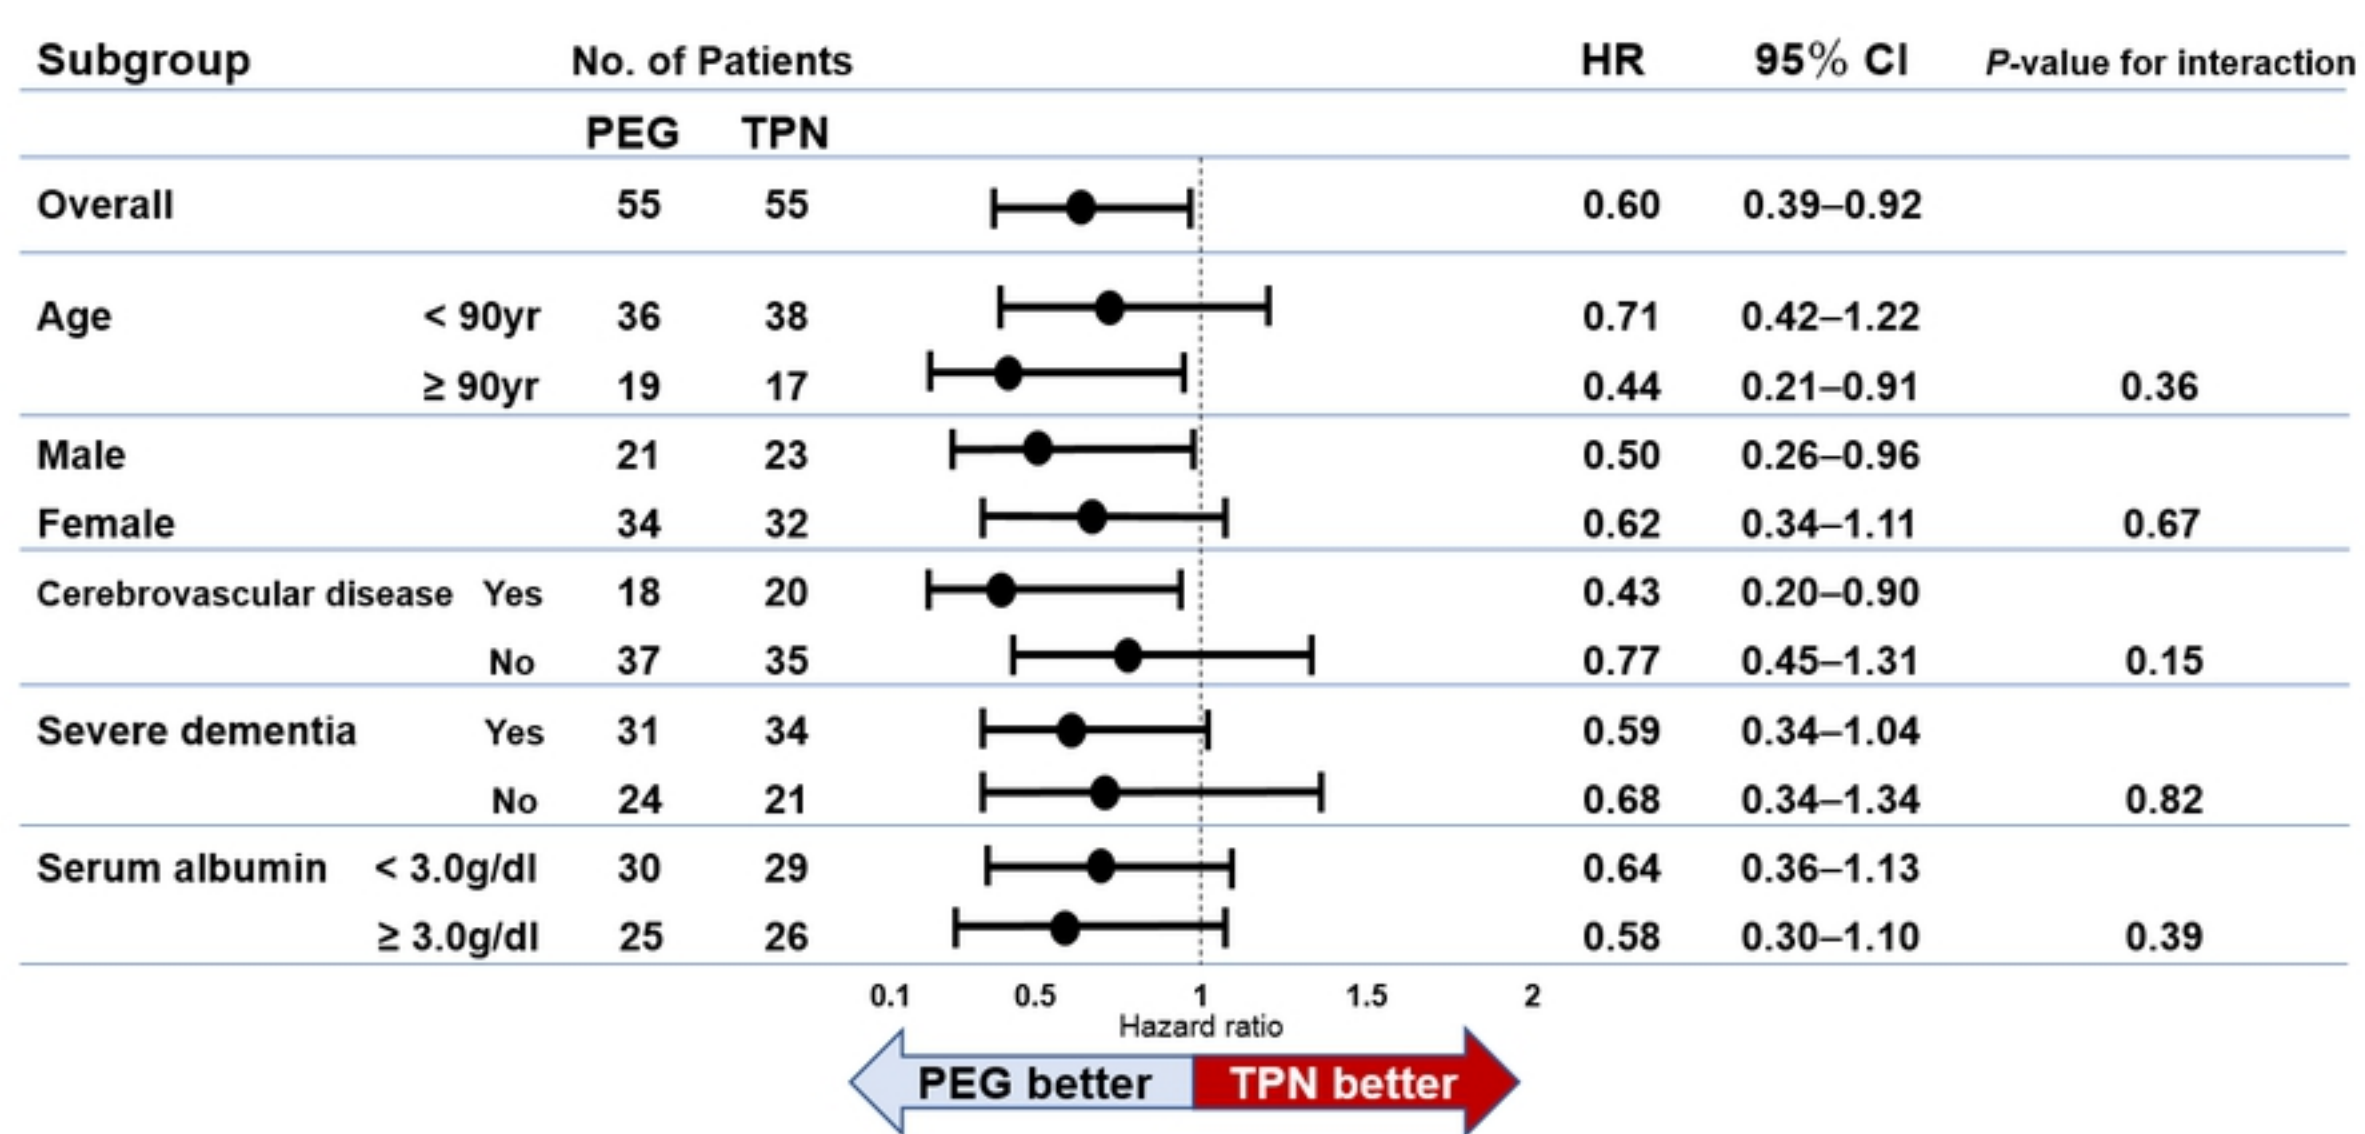

Figure 2
